# Supplementary material for: Identification of Potential Drug Targets in Cancer Signaling Pathways using Stochastic Logical Models
Source: PubMed Central journal article supplement (PMC4796823; doi:10.1038/srep23078), 2016-03-18
Supplement: srep23078-s1.pdf [file srep23078-s1.pdf]

# Identification of Potential Drug Targets in Cancer Signaling Pathway using Stochastic Logical Models.

Peican Zhu<sup>1</sup>, Hamidreza Montazeri Aliabadi<sup>2,3</sup>, Hasan Uludag<sup>3,\*</sup>, Jie Han<sup>1,\*</sup>

1 Department of Electrical and Computer Engineering, University of Alberta, Edmonton, AB T6G 2V4, Canada

2 School of Pharmacy, Chapman University, Irvine, CA 92618, USA

3 Department of Chemical and Material Engineering, University of Alberta, Edmonton, AB T6G 2V4, Canada

E-mail: hasan.uludag@ualberta.ca; jhan8@ualberta.ca

**Supplementary file**

Table S1: The sequences of the siRNAs used for this study.

| Protein | Source                              |                  |                              |
|---------|-------------------------------------|------------------|------------------------------|
| JAK2    | Qiagen<br>(Cat. No.:<br>S102659657) | Target Sequence  | 5'-AGCCATCATACGAGATCTTAA-3'  |
|         |                                     | Sense Strand     | 5'-CCAUCAUACGAGAUCUUAATT-3'  |
|         |                                     | Antisense Strand | 5'-UUAAGAUCUCGUAUGAUGGCT-3'  |
| NFκB    | Qiagen<br>(Cat. No.:<br>S100300958) | Target Sequence  | 5'-AACAGAGAGGATTTTCGTTTCC-3' |
|         |                                     | Sense Strand     | 5'-CAGAGAGGAUUUCGUUUCCTT-3'  |
|         |                                     | Antisense Strand | 5'-GGAAACGAAAUCCUCUCUGTT-3'  |
| eIF4E   | Qiagen<br>(Cat. No.:<br>S100300125) | Target Sequence  | 5'-AAGAGCGGCTCCACCACTAAA-3'  |
|         |                                     | Sense Strand     | 5'-GAGCGGCUCCACCACUAAATT-3'  |
|         |                                     | Antisense Strand | 5'-UUUAGUGGUGGAGCCGCUCTT-3'  |
| S6K     | Qiagen<br>(Cat. No.:<br>S100301721) | Target Sequence  | 5'-GGGAGTTGGACCATATGAACT-3'  |
|         |                                     | Sense Strand     | 5'-GAGUUGGACCAUAUGAACUTT-3'  |
|         |                                     | Antisense Strand | 5'-AGUUCAUAUGGUCCAACUCCC-3'  |
| Myc     | Qiagen<br>(Cat. No.:<br>S102662611) | Target Sequence  | 5'-CTCGGTGCAGCCGTATTTCTA-3'  |
|         |                                     | Sense Strand     | 5'-CGGUGCAGCCGUUUUCUATT-3'   |
|         |                                     | Antisense Strand | 5'-UAGAAAUACGGCUGCACCGAG-3'  |
| FOS     | Qiagen<br>(Cat. No.:<br>S102781429) | Target Sequence  | 5'-GACCAATATTATACTAAGAAA-3'  |
|         |                                     | Sense Strand     | 5'-CCAAUAUUUAUCUAAGAAATT-3'  |
|         |                                     | Antisense Strand | 5'-UUUCUUAGUAUAAUAUUGGTC-3'  |
| JUN     | Qiagen<br>(Cat. No.:<br>S100300580) | Target Sequence  | 5'-AAGAACGTGACAGATGAGCAG-3'  |
|         |                                     | Sense Strand     | 5'-GAACGUGACAGAUGAGCAGTT-3'  |
|         |                                     | Antisense Strand | 5'-CUGCUCaucugucacguuctt-3'  |
| Stat3   | Qiagen<br>(Cat. No.:<br>S102662338) | Target Sequence  | 5'-CAGCCTCTCTGCAGAATTCAA-3'  |
|         |                                     | Sense Strand     | 5'-GCCUCUCUGCAGAAUUCATT-3'   |
|         |                                     | Antisense Strand | 5'-UUGAAUUCUGCAGAGAGGCTG-3'  |

Table S2: The sequences of the primers used for qPCR analysis of selected proteins.

| Protein of Interest          |         | Sequence                                    |
|------------------------------|---------|---------------------------------------------|
| β-Actin (endogenous protein) | Forward | 5'-CCA CCC CAC TTC TCT CTA AGG A-3'         |
|                              | Reverse | 5'-AAT TTA CAC GAA AGC AAT GCT-3'           |
| ACVR                         | Forward | 5'-TGA GCA ATG GTA TAG TGG AGG ATT AC-3'    |
|                              | Reverse | 5'-CAG ACT ACC TTC CTC ATA TCT TCA AAA C-3' |
| JAK2                         | Forward | 5'-AAC TGC AGA TGC ACA TCA TTA CCT-3'       |
|                              | Reverse | 5'-TCG AAA TTG GGC CAT GAC A-3'             |
| NFκB                         | Forward | 5'-AAT GGG CTA CAC CGA AGC AA-3'            |
|                              | Reverse | 5'-CAG CGA GTG GGC CTG AGA-3'               |
| eIF4E                        | Forward | 5'-GAG GAC GAT GGC TAA TTA CAT TGA-3'       |
|                              | Reverse | 5'-GCA CAG AAG TGT CTC TAG CCA AAA-3'       |
| S6K                          | Forward | 5'-AAT CCG ATC ACC TCG AAG ATT TAT-3'       |
|                              | Reverse | 5'-CTG TGC TGG CCG AAG CA-3'                |
| Myc                          | Forward | 5'-TGG TCT TCC CCT ACC CTC TCA-3'           |
|                              | Reverse | 5'-AGA ATC CGA GGA CGG AGA GAA-3'           |
| FOS                          | Forward | 5'-CTG AAG ACC GAG CCC TTT GA-3'            |
|                              | Reverse | 5'-GGA GCG GGC TGT CTC AGA-3'               |
| JUN                          | Forward | 5'-GAG AGG AAG CGC ATG AGG AA-3'            |
|                              | Reverse | 5'-TCC AGC CGG GCG ATT-3'                   |
| Stat3                        | Forward | 5'-ACA ACA TGT CAT TTG CTG AAA TCA-3'       |
|                              | Reverse | 5'-TCC TTG GGA ATG TCA GGA TAG AG-3'        |

Table S3 Logical relationships for multiple interactions with a single gene in sub-pathway 1. Standards of pathway representation in Figure 2(a) facilitate the understanding of the pathway (SBGN in [Ref. 44])

| Biological relationship             | Logical expression                                      |
|-------------------------------------|---------------------------------------------------------|
| (JAK, MUC1) → Stat3                 | Stat3 = OR(JAK, MUC1)                                   |
| (Bcl-2, MCL1, Survivin) ⊣ Apoptosis | Apoptosis =<br>OR(NOT(Bcl-2), NOT(MCL1), NOT(Survivin)) |

Table S4 Logical relationships for multiple interactions with a single gene in sub-pathway 2. Standards of pathway representation in Figure 2(b) facilitate the understanding of the pathway (SBGN in [Ref. 44])

| Biological relationship                                  | Logical expression                                                              |
|----------------------------------------------------------|---------------------------------------------------------------------------------|
| (MUC1, GFs) → Ras                                        | Ras = OR(MUC1, GFs)                                                             |
| (Ras, GFs, FAK) ⊣ PI3K                                   | PI3K = OR(Ras, GFs, FAK)                                                        |
| (Akt, S6K) ⊣ BAD                                         | BAD = OR(NOT(Akt), NOT(S6K))                                                    |
| (S6K, NFκB, eIF4E) → Bcl-2                               | Bcl-2 = OR(S6K, AND(NFκB, eIF4E))                                               |
| (S6K, NFκB, eIF4E) → MCL1                                | MCL1 = OR(S6K, AND(NFκB, eIF4E))                                                |
| (S6K, NFκB, eIF4E) → Survivin                            | Survivin = OR(S6K, AND(NFκB, eIF4E))                                            |
| (BAD, Ceramide) ⊣<br>(Bcl-2, MCL1, Survivin) → Apoptosis | Apoptosis = OR(BAD, AND(Ceramide,<br>OR(NOT(Bcl-2), NOT(MCL1), NOT(Survivin)))) |

Table S5 Logical relationships for multiple interactions with a single gene in sub-pathway 3. Standards of pathway representation in Figure 2(c) facilitate the understanding of the pathway (SBGN in [Ref. 44])

| Biological relationship             | Logical expression                                      |
|-------------------------------------|---------------------------------------------------------|
| (MUC1, GFs) → Ras                   | Ras = OR(MUC1, GFs)                                     |
| (JAK, Raf) → MEK                    | MEK = OR(JAK, Raf)                                      |
| (MEKK, Src) → Myc                   | Myc = OR(MEKK, Src)                                     |
| (JUN, FOS, Myc) → MCL1              | MCL1 = AND(JUN, FOS, Myc)                               |
| (Myc, JUN) → Bcl-2                  | Bcl-2 = AND(Myc, JUN)                                   |
| (Bcl-2, MCL1, Survivin) → Apoptosis | Apoptosis =<br>OR(NOT(Bcl-2), NOT(MCL1), NOT(Survivin)) |
